# Supplementary material for: A recognition-induced three-dimensional bipedal DNA walker for highly sensitive detection of APE1
Source: Royal Society of Chemistry journal article supplement (doi:10.1039/d4ay01353k), 2024-01-01
Supplement: d4ay01353k3.pdf [file d4ay01353k3.pdf]

1

## Supporting Information

2 **Recognition-induced three-dimensional bipedal DNA walker**

3 **for highly sensitive detection of APE1**

4 Qingyi Liu<sup>a</sup>, Qiongdan Zhang<sup>a</sup>, Yuting Zhang<sup>a</sup>, Fanghong Tian<sup>a</sup>, Kang Long<sup>a</sup>, Yupei  
5 Yang<sup>a</sup>, Wei Wang<sup>a</sup>, Caiyun Peng<sup>a,b\*</sup>, Huizhen Wang<sup>a\*\*</sup>

6 <sup>a</sup>TCM and Ethnomedicine Innovation & Development International Laboratory, School  
7 of Pharmacy, Hunan University of Chinese Medicine, 410208, Changsha, China.

8 <sup>b</sup>Science & Technology Innovation center, Hunan University of Chinese Medicine,  
9 410208, Changsha, China.

10 Correspondence to: Huizhen Wang, Caiyun Peng

11 Dr. Huizhen Wang

12 E-mail address: whuiz0086@163.com

13 TCM and Ethnomedicine Innovation & Development International Laboratory, School  
14 of Pharmacy, Hunan University of Chinese Medicine, 410208, Changsha, China.

15 Tel: +86 15116481295

16 Prof. Caiyun Peng

17 E-mail address: caiyunpeng@hnu cm.edu.cn

18 TCM and Ethnomedicine Innovation & Development International Laboratory, School  
19 of Pharmacy, Hunan University of Chinese Medicine, 410208, Changsha, China.

20 Science & Technology Innovation center, Hunan University of Chinese Medicine,  
21 410208, Changsha, China.

22 Tel: +86 13874807689

23

## 24 **1. Materials and reagents**

25 Apurinic/aprimidinic endonuclease 1 (APE1), bovine serum albumin (BSA), 8-  
26 oxoguanine DNA glycosylase (OGG1), human alkyl adenine DNA glycosylase  
27 (hAAG), uracil DNA glycosylase (UDG) and 8-oxoGDNA glycosylase (FPG) were  
28 supplied by New England Biolabs (Beijing, China). Exonuclease III (Exo III) were  
29 obtained from Takara (Beijing, China). Chloroauric acid ( $\text{HAuCl}_4 \cdot 4\text{H}_2\text{O}$ ) was procured  
30 from Sinopharm Chemical Reagent (Shanghai, China). Trisodium citrate was  
31 purchased from Damao Chemical Reagent Factory (Tianjin, China). Mercaptoethanol  
32 and dithiothreitol were acquired from Dingguo Biotech (Beijing, China). Tris-(2-  
33 carboxyethyl)-phosphine hydrochloride (TCEP) was purchased from Sangon Biotech  
34 Co., Ltd. (Shanghai, China). All oligonucleotides were synthesized by Hippo  
35 Biotechnology Co., Ltd. (Huzhou, China), and the sequence information of  
36 oligonucleotides were provided in Table S1. Michigan Cancer Foundation-7 (MCF-7),  
37 RAW 264.7, minimum essential medium (MEM), fetal bovine serum (FBS) and  
38 penicillin-streptomycin were purchased from Procell Life Science & Technology Co.,  
39 Ltd (Wuhan, China). 7-nitroindole-2-carboxylic acid (NCA) was purchased from Med  
40 Chem Express (New Jersey, USA), and its structure information is detailed in Table S2.

## 41 **2. Preparation of 13 nm AuNPs**

42 Citrate-stabilized Au nanoparticles (AuNPs) with a size of 13 nm were synthesized  
43 using citrate stabilization, following established techniques.<sup>1, 2</sup> Briefly immerse all  
44 glassware in the prepared solution -  $\text{HCl}/\text{HNO}_3$  (3:1), then washed many times with  
45 Milli-Q water, and subsequently dried before to the experiments. Then, 3 mL of 1%

46 trisodium citrate was quickly injected into a boiling solution composed of 50 mL of  
47 0.01 % HAuCl<sub>4</sub> while stirring. The solution was then refluxed for an additional 15 min  
48 after color changed. The AuNPs were stored at 4 °C for further analysis.

### 49 **3. Preparation of nanoflares**

50 Before nanoflares immobilization, 15 μL of 50 μM thiol modified H1 was  
51 incubated with 7.5 μL of 10 mM TCEP at room temperature for 1 h to prevent disulfide  
52 bond formation. Subsequently, the solution was mixed with 10 nM AuNPs and shaken  
53 overnight. After 16 h, during salt aging, different volumes of NaCl were gradually  
54 added to the mixture over 8 h. The above solution was centrifuged at 13 000 rpm for  
55 30 min and then washed with PBS to remove unmodified H1. The resulting nanoflares  
56 were re-suspended in PBS buffer and stored in a dark environment at 4 °C.

### 57 **4. Assemble of the block-DNA/bipedal walker**

58 The block-DNA/bipedal walker involves a bipedal walker with the walking  
59 strands enclosed by block-DNA. Initially, bipedal walker and excess block-DNA are  
60 added to Mops buffer, reacted at 37 °C for 30 min, and then annealed. Given that block-  
61 DNA contains AP site, the denaturation temperature during annealing was set to 80°C  
62 for 5 min for denaturation, followed by gradual cooling to room temperature to establish  
63 a stable double-stranded structure.

### 64 **5. Cell culture and cell lysate**

65 MCF-7 cell and RAW 264.7 cell were cultured in MEM medium. All cells were  
66 maintained in a humidified CO<sub>2</sub> incubator (5%) at 37°C. The cells were transferred to  
67 RNase-free 1.5 mL centrifuge tubes, washed twice with PBS, centrifuged at 2000 rpm

68 for 3 min, and then suspended in 100  $\mu$ L of lysis buffer. After a 40 min incubation on  
69 ice, the lysate was centrifuged at 12000 rpm for 20 min at 4 °C and the resulting extract  
70 immediately employed for APE1 detection. During the experimental reaction process,  
71 APE1 was substituted with the cell lysate, and the remaining reactions were carried out  
72 under identical conditions to measure its fluorescence signal.

73

74

75

76

77

78

79

80

81

82

83

84

85

86

87

88

89

90

**Table S1 Sequence information of the oligonucleotides**

| Name            | Sequence (5' - 3')                                                                                    |
|-----------------|-------------------------------------------------------------------------------------------------------|
| bipedal walker  | AGG CAC TCG ATC CAA TCA TCA GCT TTT TTT TTT TTT<br>TTT TTT TTT TTT TTT AGG CAC TCG ATC CAA TCA TCA GC |
| unipedal walker | AGG CAC TCG ATC CAA TCA TCA GCT TTT TTT TTT TTT<br>TTT TTT TTT TTT TTT                                |
| block-DNA       | GAT TGG ATX GAG TGC CT                                                                                |
| block'-DNA      | GAT TGG ATC GAG TGC CT                                                                                |
| H1              | SH-TTT TTT TTC GAT CCA ATC ATC AGC CTA GCT CCG<br>AAT TCC GCT GAT GAT TGG ATC GAG TGC CT-FAM          |

91 Note: X represents the AP site recognized by APE1. The blue colored sections are the functional  
92 regions of the respective DNA sequences.

93

**Table S2 The structure information of NCA**

| Code Name | Molecular Formula                                           | Structure                                                                            |
|-----------|-------------------------------------------------------------|--------------------------------------------------------------------------------------|
| NCA       | C <sub>9</sub> H <sub>6</sub> N <sub>2</sub> O <sub>4</sub> | 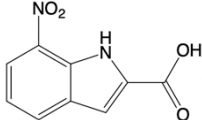 |

94

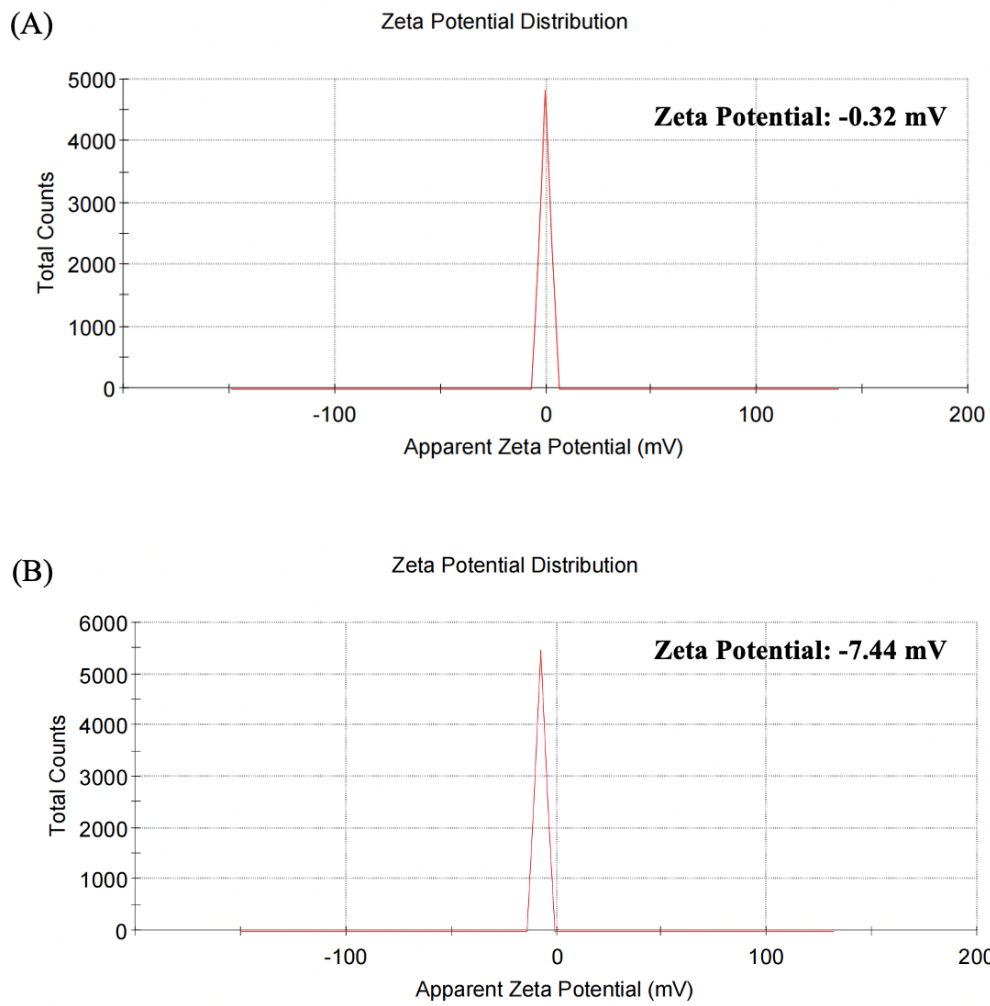

95

96 Fig. S1. Zeta potential distributions of (A) AuNPs and (B) nanoflares.

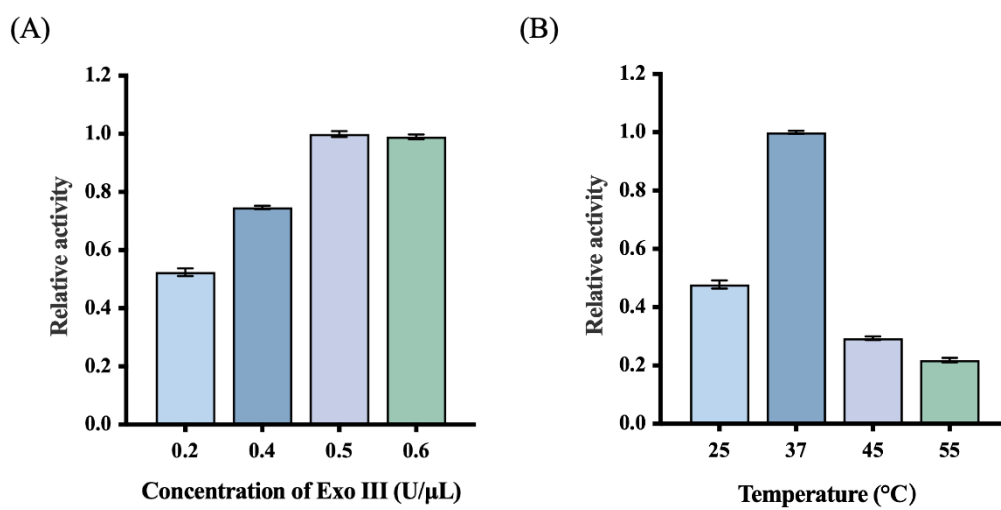

97

98 Fig. S2. Optimization of assay conditions. (A) Concentration of Exo III. (B) Reaction temperature.

99 Error bars represent standard deviations based on three replicate measurements.

100 **References**

- 101 1. H. D. Hill and C. A. Mirkin, *Nat. protoc.*, 2006, **1**, 324-336.
- 102 2. J. Shen, L. Liang, M. Xiao, X. Xie, F. Wang, Q. Li, Z. Ge, J. Li, J. Shi and L.
- 103 Wang, *J. Am. Chem. Soc.*, 2019, **141**, 11938-11946.

104
