# Supplementary figures and images for: A recognition-induced three-dimensional bipedal DNA walker for highly sensitive detection of APE1
Source: Royal Society of Chemistry journal article supplement (doi:10.1039/d4ay01353k), 2024-01-01

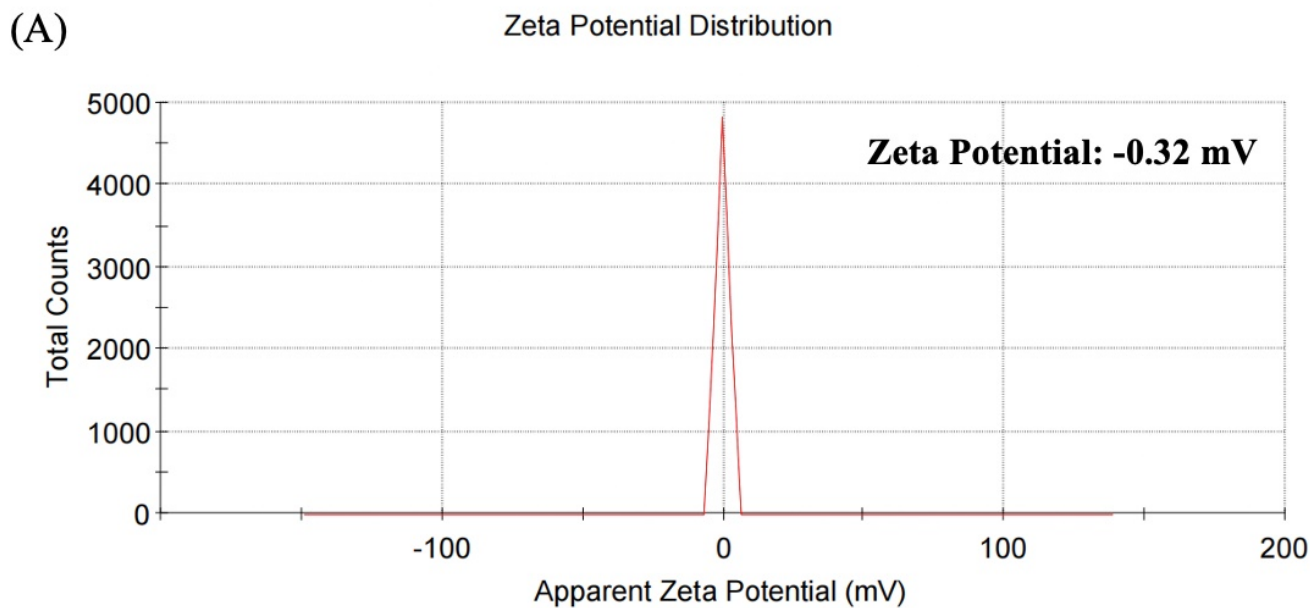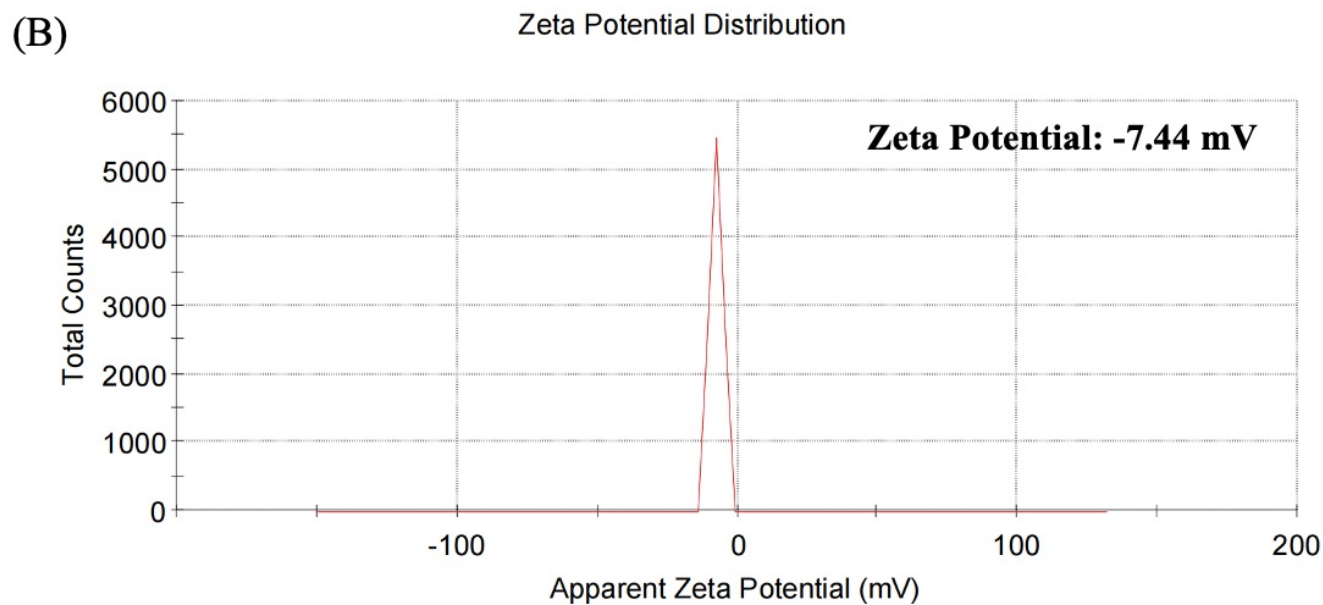

Supplement: d4ay01353k1.pdf [file d4ay01353k1.pdf]

(A)

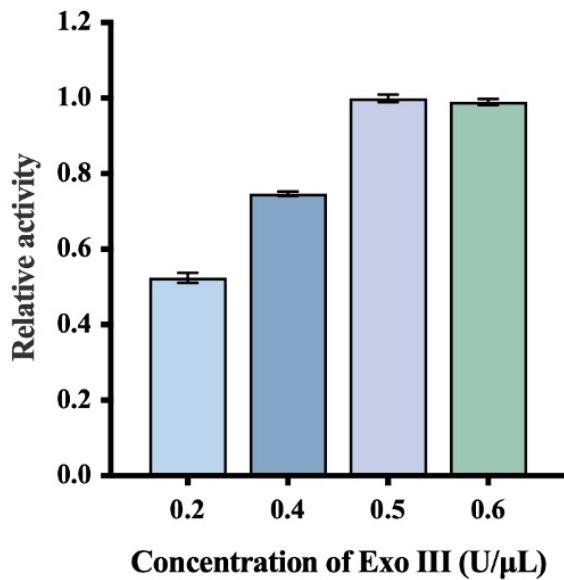

(B)

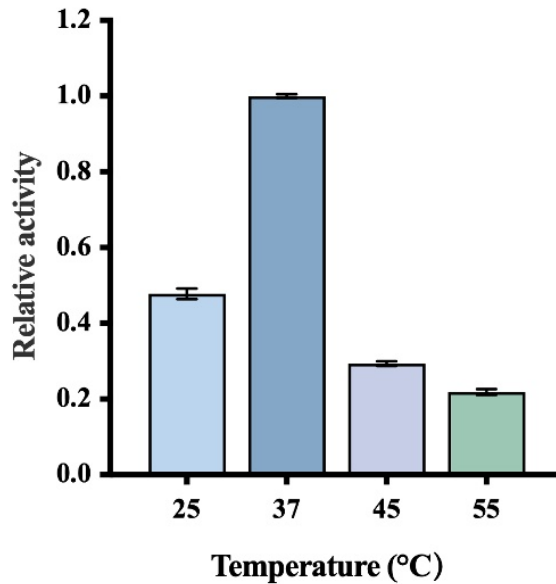

Supplement: d4ay01353k2.pdf [file d4ay01353k2.pdf]
